# Supplementary material for: Feasibility Study and Direct Extraction of Endogenous Free Metallic Cations Combining Hemodialysis and Chelating Polymer
Source: Research Square preprint supplement (doi:10.21203/rs.3.rs-678010/v1), 2021-07-19
Supplement: Supplementary file 2 [file 68a764a649a07035491070ec.xlsx]

## Sheet: Summary
Summary
S1	Kruskal-Wallis and Dunn tests on the on the blood analysis according to samples types (before HD, after HD, N day(s) after HD), with the Theralite membrane
S2	Kruskal-Wallis and Dunn tests on the on the blood analysis according to samples types (before HD, after HD, N day(s) after HD), with the POLYFLUX H6 membrane
S3	Kruskal-Wallis and Dunn tests on the on the blood analysis according to samples types (before HD, after HD, N day(s) after HD), with the SepteX membrane
S4	Summary of the dialysis bag metallome data and Kruskal-Wallis and Dunn tests according to time, by membrane
S5	Net metals increase in dialysis bags, per membrane and membrane efficiency comparison by Kruskal-Wallis and Dunn tests
S6	Summary of the whole blood metallome
S7	Summary of the plama metallome

## Sheet: S1
Sheep ID	Sheep ID	Before/After HD	Days	Membrane	Type	Sodium (Na) (mmol/L)			Chlore (Cl) (mmol/L)	Potassium (K) (mmol/L)	Creatine (µmol/L)	Albumin (g/L)			Protein (g/L)			Calcium (Ca) (mmol/L)	pH	Alanine aminotransferase (ALT) (UI/L)	Aspartate aminotransferase (AST) (UI/L)	Alkaline phosphatase (ALP) (UI/L)	Gamma glutamyl transferase (GGT) (UI/L)	Serum amyloid A (SAA) (mg/mL)	Red blood cells (RBC) (10^12/L)			Hemoglobin (HGB) (g/dL)	Hematocrit (HCT) (%)	Mean corpuscular volume (MCV) (fL)	Mean corpuscular hemoglobin (MCH) (pg)	Mean corpuscular hemoglobin concentration (MCHC) (g/dL)	Red blood cells distribution width (RDW-SD) (fL)	Red blood cells distribution width (RDW-CV) (%)			Reticulocyte hemoglobin equivalent (RET) (%)	Reticulocyte hemoglobin equivalent (RET_He) (pg)	White blood cells (WBC) (10^9/L)	White blood cells (D-WBC) (10^9/L)	Neutrophils (10^9/L)	Lymphocytes (10^9/L)	Monocytes (10^9/L)	Eosinophils (10^9/L)	Basophils (10^9/L)	Platelet impedance (PLT-I) (10^9/L)	Platelet optical fluorescence (PLT-O) (10^9/L)
Sheep A	50528	No HD	D0	No HD	Before HD	145			102	4.5	71	27			66			1.11	7.41	21	133	96	46	0.9	11.11			10	29.4	29.1	9.9	34	24.5	28.1			0.02		9.74	9.33	4.54	4.1	0.46	0.57	0.07	527	447
Sheep C	50543	No HD	D0	No HD	Before HD	143			101	4.2	73	24			65			1.07	7.34	22	112	85	35	1.8	9.47			8.8	22	23.2	9.3	40	19.5	28.1			0.09	24.2	8.94	8.86	3.14	4.97	0.31	0.47	0.05	244	296
Sheep D	50534	No HD	D0	No HD	Before HD	143			103	4.9	142	27			73			1.14	7.32	35	190	100	42	1.5	11.21			10.8	29.4	26.2	9.6	36.7	23.9	29.5			0.14	22.6	9.6	9.49	2.56	5.58	0.09	1.18	0.22
sheep B	50529	No HD	D0	No HD	Before HD	141			112	4.3	83	26			68			1.13	7.38	27	141	66	45	1.7	10.17			9.8	29.6	29.1	9.6	33.1	24.3	28			0.02	0	9.93	10.16	4.21	4.78	0.59	0.3	0.05	445	374
Sheep A	50528	Before HD	D1	Theralite	Before HD	145			106	4.7	124	27			62			1.2	7.38	23	177	130	44	3.3	10.72			10.7	27.9	26	10	38.4	23.4	29.2			0.31	18.8	16.41	16.23	9.92	5.6	0.45	0.36	0.08	586	451
sheep B	50529	Before HD	D1	Theralite	Before HD	144			106	4.8	150	25			62			1.17	7.42	31	183	64	38	2.6	10.66			10.4	27.4	25.7	9.8	38	22.8	29.1			0.21	31.8	20.42	20	13.68	6	0.53	0.13	0.07	502	446
Sheep C	50543	Before HD	D2	Theralite	Before HD	141			111	4.6	88	23			68			1.14	7.4	24	127	95	37	3.2	10.36			9.7	23.8	23	9.4	40.8	20.5	29.4			0.18	25.2	15.5	15.51	8.55	5.66	0.35	0.86	0.08	326	304
Sheep D	50534	Before HD	D2	Theralite	Before HD	143			107	4.9	112	25			72			1.2	7.36	37	202	114	45	1.8	11.35			11.1	29.5	26	9.8	37.6	23.8	30			0.13	16.6	9.78	10	2.13	5.86		1.45	0.23	513	354
Sheep A	50528	After HD	D1	Theralite	After HD	149			100	4.2	101	23			56			1.21	7.44	21	138	87	38	2.9	10.22			10.2	26.6	26	10	38.3	23.2	28.7			0.36	18.8	13.61	13.43	7.89	4.99	0.42	0.22	0.09	432	401
sheep B	50529	After HD	D1	Theralite	After HD	146			104	4.4	157	25			62			1.15	7.4	30	163	48	23	8.6	10.11			10	26.2	25.9	9.9	38.2	22.7	28.6			0.16	32.8	17.69	18.91	10.53	6.17	0.51	0.4	0.08	426	315
Sheep C	50543	After HD	D2	Theralite	After HD					5	102	21			61					20	96	79	31	3.2	9.39			8.9	21.9	23.3	9.4	40.2	19.6	27.8			0.2	23.2	13.77	13.96	6.57	6.3	0.32	0.51	0.07	207	200
Sheep D	50534	After HD	D2	Theralite	After HD	145			101	4.3	134	23			61					35	183	90	40	0	9.75			9.5	26	26.7	9.7	36.5	23.5	27.4			0.14	21.5	11	10.77	4.88	4.86	0.1	0.95	0.21	294	267
Sheep A	50528	Before HD	D3	HF6	N day(s) after HD	142			103	4.7	92	23			59			1.25	7.44	18	126	65	42	0.9	9.46			9.4	25.4	28.8	9.9	37	24.1	27.6			0.3	17.8	9.17	9.25	3.18	5.07	0.43	0.32	0.17	507	442
sheep B	50529	Before HD	D3	HF6	N day(s) after HD	142			110	4.3	130	23			61			1.17	7.44	22	134	45	42	2.5	9.19			9	24.3	26.4	9.8	37	22.8	27.2			0.15	21.8	14.07	14.58	5.23	7.54	0.56	0.58	0.16	445	419
Sheep C	50543	Before HD	D4	Septex	N day(s) after HD	141			107	4.5	83	22			64			1.18	7.45	21	107	59	36	0.5	9.81			9.2	22.8	23.2	9.4	40.4	19.9	28.7			0.09	18.6	7.99	8.2	2.19	5.12	0.32	0.27	0.09	303	227
Sheep D	50534	Before HD	D4	Septex	N day(s) after HD	144			108	4.8	113	22			61			1.22	7.38	34	181	107	41	0.4	9.01			8.7	24.4	27.1	9.7	35.7	23.6	26.7			0.1	17.2	8.67	8.66	2.24	4.99	0.13	1.09	0.22	345	258
Mean(before)						143,13 (± 1,55 )			106,00 (± 4,00 )	4,61 (± 0,26 )	105,38 (± 31,07 )	25,50 (± 1,51 )			67,00 (± 4,11 )			1,15 (± 0,04 )	7,38 (± 0,03 )	27,50 (± 6,14 )	158,13 (± 33,67 )	93,75 (± 22,37 )	41,50 (± 4,24 )	2,10 (± 0,85 )	10,63 (± 0,62 )			10,16 (± 0,74 )	27,38 (± 2,92 )	26,04 (± 2,27 )	9,68 (± 0,24 )	37,33 (± 2,68 )	22,84 (± 1,85 )	28,93 (± 0,76 )			0,14 (± 0,10 )	19,89 (± 10,03 )	12,54 (± 4,30 )	12,45 (± 4,20 )	6,09 (± 4,16 )	5,32 (± 0,65 )	0,40 (± 0,17 )	0,67 (± 0,46 )	0,11 (± 0,07 )	449,00 (± 121,74 )	381,71 (± 67,59 )
Mean(after)						146,67 (± 2,08 )			101,67 (± 2,08 )	4,48 (± 0,36 )	123,50 (± 27,09 )	23,00 (± 1,63 )			60,00 (± 2,71 )			1,18 (± 0,04 )	7,42 (± 0,03 )	26,50 (± 7,23 )	145,00 (± 37,50 )	76,00 (± 19,24 )	33,00 (± 7,70 )	3,68 (± 3,59 )	9,87 (± 0,38 )			9,65 (± 0,58 )	25,18 (± 2,20 )	25,48 (± 1,49 )	9,75 (± 0,26 )	38,30 (± 1,51 )	22,25 (± 1,80 )	28,13 (± 0,63 )			0,22 (± 0,10 )	24,08 (± 6,09 )	14,02 (± 2,76 )	14,27 (± 3,40 )	7,47 (± 2,38 )	5,58 (± 0,76 )	0,34 (± 0,18 )	0,52 (± 0,31 )	0,11 (± 0,07 )	339,75 (± 109,03 )	295,75 (± 84,54 )
Mean(a day after)						142,25 (± 1,26 )			107,00 (± 2,94 )	4,58 (± 0,22 )	104,50 (± 21,14 )	22,50 (± 0,58 )			61,25 (± 2,06 )			1,21 (± 0,04 )	7,43 (± 0,03 )	23,75 (± 7,04 )	137,00 (± 31,44 )	69,00 (± 26,68 )	40,25 (± 2,87 )	1,08 (± 0,97 )	9,37 (± 0,35 )			9,08 (± 0,30 )	24,23 (± 1,07 )	26,38 (± 2,34 )	9,70 (± 0,22 )	37,53 (± 2,01 )	22,60 (± 1,88 )	27,55 (± 0,85 )			0,16 (± 0,10 )	18,85 (± 2,05 )	9,98 (± 2,77 )	10,17 (± 2,97 )	3,21 (± 1,42 )	5,68 (± 1,24 )	0,36 (± 0,18 )	0,57 (± 0,38 )	0,16 (± 0,05 )	400,00 (± 92,93 )	336,50 (± 109,68 )
% deviation from the T0 mean (after)						2.47453			-4.08805	-2.98103	17.2005	-9.80392			-10.4478			3.05677	0.59312	-3.63636	-8.3004	-18.9333	-20.4819	75	-7.18401			-5.04305	-8.03653	-2.16035	0.775194	2.61219	-2.57252	-2.76577			56.3636	21.0668	11.7823	14.6214	22.5939	4.91187	-15.018	-21.8045	5.88235	-24.3318	-22.5206
% deviation from the T0 mean (a day after)						-0.611354			0.943396	-0.813008	-0.830368	-11.7647			-8.58209			5.24017	0.694797	-13.6364	-13.3597	-26.4	-3.01205	-48.8095	-11.8871			-10.7011	-11.5068	1.29621	0.258398	0.535834	-1.03996	-4.75367			16.3636	-5.20833	-20.4545	-18.2768	-47.3015	6.79201	-9.35252	-15.0376	50.5882	-10.9131	-11.8451
Kruskal-Wallis tests (by type)						> kruskal.test( Na ~Type, data=data_1)			> kruskal.test( Cl ~Type, data=data_1)	> kruskal.test( K ~Type, data=data_1)	> kruskal.test( Cre ~Type, data=data_1)	> kruskal.test( Alb ~Type, data=data_1)			> kruskal.test( Prot ~Type, data=data_1)			> kruskal.test( Ca ~Type, data=data_1)	> kruskal.test( pH ~Type, data=data_1)	> kruskal.test( ALT ~Type, data=data_1)	> kruskal.test( AST ~Type, data=data_1)	> kruskal.test( PAL ~Type, data=data_1)	> kruskal.test( GGT ~Type, data=data_1)	> kruskal.test( SAA ~Type, data=data_1)	> kruskal.test( RBC ~Type, data=data_1)			> kruskal.test( HGB ~Type, data=data_1)	> kruskal.test( HCT ~Type, data=data_1)	> kruskal.test( MCV ~Type, data=data_1)	> kruskal.test( MCH ~Type, data=data_1)	> kruskal.test( MCHC ~Type, data=data_1)	> kruskal.test( RDW_ST ~Type, data=data_1)	> kruskal.test( RDW_CV ~Type, data=data_1)			> kruskal.test( RET ~Type, data=data_1)	> kruskal.test( RET_He ~Type, data=data_1)	> kruskal.test( WBC ~Type, data=data_1)	> kruskal.test( D_WBC ~Type, data=data_1)	> kruskal.test( Neut ~Type, data=data_1)	> kruskal.test( Lymph ~Type, data=data_1)	> kruskal.test( Mono ~Type, data=data_1)	> kruskal.test( EO ~Type, data=data_1)	> kruskal.test( Baso ~Type, data=data_1)	> kruskal.test( PLT_I ~Type, data=data_1)	> kruskal.test( PLT_O ~Type, data=data_1)
Kruskal-Wallis results (by type)						Kruskal-Wallis chi-squared = 6.8296, df = 2, p-value = 0.03288			Kruskal-Wallis chi-squared = 4.2066, df = 2, p-value = 0.1221	Kruskal-Wallis chi-squared = 0.67623, df = 2, p-value = 0.7131	Kruskal-Wallis chi-squared = 1.4843, df = 2, p-value = 0.4761	Kruskal-Wallis chi-squared = 8.6809, df = 2, p-value = 0.01303			Kruskal-Wallis chi-squared = 9.5357, df = 2, p-value = 0.008499			Kruskal-Wallis chi-squared = 4.8373, df = 2, p-value = 0.08904	Kruskal-Wallis chi-squared = 5.2849, df = 2, p-value = 0.07119	Kruskal-Wallis chi-squared = 1.875, df = 2, p-value = 0.3916	Kruskal-Wallis chi-squared = 1.5284, df = 2, p-value = 0.4657	Kruskal-Wallis chi-squared = 3.3254, df = 2, p-value = 0.1896	Kruskal-Wallis chi-squared = 4.3773, df = 2, p-value = 0.1121	Kruskal-Wallis chi-squared = 3.329, df = 2, p-value = 0.1893	Kruskal-Wallis chi-squared = 8.9724, df = 2, p-value = 0.01126			Kruskal-Wallis chi-squared = 5.7037, df = 2, p-value = 0.05774	Kruskal-Wallis chi-squared = 4.2581, df = 2, p-value = 0.119	Kruskal-Wallis chi-squared = 0.68296, df = 2, p-value = 0.7107	Kruskal-Wallis chi-squared = 0.39897, df = 2, p-value = 0.8192	Kruskal-Wallis chi-squared = 0.39764, df = 2, p-value = 0.8197	Kruskal-Wallis chi-squared = 1.2965, df = 2, p-value = 0.523	Kruskal-Wallis chi-squared = 6.4049, df = 2, p-value = 0.04066			Kruskal-Wallis chi-squared = 1.983, df = 2, p-value = 0.371	Kruskal-Wallis chi-squared = 2.4647, df = 2, p-value = 0.2916	Kruskal-Wallis chi-squared = 3.9044, df = 2, p-value = 0.142	Kruskal-Wallis chi-squared = 3.9044, df = 2, p-value = 0.142	Kruskal-Wallis chi-squared = 3.7279, df = 2, p-value = 0.1551	Kruskal-Wallis chi-squared = 0.40317, df = 2, p-value = 0.8174	Kruskal-Wallis chi-squared = 0.4356, df = 2, p-value = 0.8043	Kruskal-Wallis chi-squared = 0.19853, df = 2, p-value = 0.9055	Kruskal-Wallis chi-squared = 2.7733, df = 2, p-value = 0.2499	Kruskal-Wallis chi-squared = 3.4235, df = 2, p-value = 0.1805	Kruskal-Wallis chi-squared = 2.85, df = 2, p-value = 0.2405
Dunn tests (by type)						> kwAllPairsDunnTest( Na ~Type, data=data_1)						> kwAllPairsDunnTest( Alb ~Type, data=data_1)			> kwAllPairsDunnTest( Prot~Type, data=data_1)										> kwAllPairsDunnTest( RBC~Type, data=data_1)									>kwAllPairsDunnTest(RDW_CV~Type, data=data_1)
Dunn results (by type)							A day after	After					A day after	After		A day after	After									A day after	After								A day after	After
						After	0.034	-				After	0.595	-	After	0.822	-								After	0.334	-							After	0.457	-
						Before	0.419	0.067				Before	0.023	0.079	Before	0.034	0.025								Before	0.012	0.158							Before	0.049	0.244

## Sheet: S2
Sheep ID	Sheep ID	Before/After HD	Days	Membrane	Type	Sodium (Na) (mmol/L)	Chlore (Cl) (mmol/L)	Potassium (K) (mmol/L)	Creatine (µmol/L)	Albumin (g/L)	Protein (g/L)	Calcium (Ca) (mmol/L)	pH	Alanine aminotransferase (ALT) (UI/L)	Aspartate aminotransferase (AST) (UI/L)	Alkaline phosphatase (ALP) (UI/L)	Gamma glutamyl transferase (GGT) (UI/L)			Serum amyloid A (SAA) (mg/mL)	Red blood cells (RBC) (10^12/L)	Hemoglobin (HGB) (g/dL)	Hematocrit (HCT) (%)	Mean corpuscular volume (MCV) (fL)	Mean corpuscular hemoglobin (MCH) (pg)	Mean corpuscular hemoglobin concentration (MCHC) (g/dL)	Red blood cells distribution width (RDW-SD) (fL)	Red blood cells distribution width (RDW-CV) (%)	Reticulocyte hemoglobin equivalent (RET) (%)	Reticulocyte hemoglobin equivalent (RET_He) (pg)	White blood cells (WBC) (10^9/L)	White blood cells (D-WBC) (10^9/L)	Neutrophils (10^9/L)	Lymphocytes (10^9/L)	Monocytes (10^9/L)			Eosinophils (10^9/L)	Basophils (10^9/L)	Platelet impedance (PLT-I) (10^9/L)	Platelet optical fluorescence (PLT-O) (10^9/L)
Sheep A	50528	No HD	D0	No HD	Before HD	145	102	4.5	71	27	66	1.11	7.41	21	133	96	46			0.9	11.11	10	29.4	29.1	9.9	34	24.5	28.1	0.02		9.74	9.33	4.54	4.1	0.46			0.57	0.07	527	447
sheep B	50529	No HD	D0	No HD	Before HD	141	112	4.3	83	26	68	1.13	7.38	27	141	66	45			1.7	10.17	9.8	29.6	29.1	9.6	33.1	24.3	28	0.02		9.93	10.16	4.21	4.78	0.59			0.3	0.05	445	374
Sheep A	50528	Before HD	D3	HF6	Before HD	142	103	4.7	92	23	59	1.25	7.44	18	126	65	42			0.9	9.46	9.4	25.4	28.8	9.9	37	24.1	27.6	0.3	17.8	9.17	9.25	3.18	5.07	0.43			0.32	0.17	507	442
sheep B	50529	Before HD	D3	HF6	Before HD	142	110	4.3	130	23	61	1.17	7.44	22	134	45	42			2.5	9.19	9	24.3	26.4	9.8	37	22.8	27.2	0.15	21.8	14.07	14.58	5.23	7.54	0.56			0.58	0.16	445	419
Sheep A	50528	After HD	D3	HF6	After HD	141	103	4.4	88	21	51	1.23	7.51	18	118	83	39			1.3	8.53	8.5	23.2	27.2	10	36.6	23.6	26.2	0.28	19.3	8.94	9.9	3.74	4.35	0.37			0.34	0.14	403	346
sheep B	50529	After HD	D3	HF6	After HD	145	102	4.5	125	21	55	1.15	7.51	22	126	46	40			0	9.23	9	24.2	26.2	9.8	37.2	22.4	27.2	0.09	24.9	11.91	11.71	7.13	4.33	0.32			0.06	0.07	399	351
Sheep A	50528	No HD	D7	No HD	N day(s) after HD	141	103	4.6	92	25	55	1.14	7.43	22	141	83	49			0	10.22	10.1	27.2	26.6	9.9	37.1	24.1	28.7	0.21	17.9	11.2	11.06	3.65	6.51	0.41			0.24	0.21	666	517
sheep B	50529	No HD	D7	No HD	N day(s) after HD	142	106	4.2	88	24	58	1.17	7.41	19	120	43	51			1.2	8.3	8	22.7	27.3	9.6	35	23.3	25.9	0.06	17.4	8.11	8.19	3.46	3.8	0.39			0.34	0.12	396	302
Sheep A	50528	No HD	D10	No HD	N day(s) after HD	142	103	5.6	90	27	62	1.22	7.34	23	151	77	46			2	11.4	11.3	29.5	25.9	9.9	38.3			0.3	33	13.9		4.7	8.4	0.4			0.3	0.1	678	537
sheep B	50529	No HD	D10	No HD	N day(s) after HD	138	104	4.6	79	22	66	1.14	7.41	19	128	34	49			1.4	8.4	8	22.2	26.5	9.5	36			0.2	15.9	10.8		3.4	6.3	0.5			0.7		470	385
Mean(before)						142,50 (± 1,73 )	106,75 (± 4,99 )	4,45 (± 0,19 )	94,00 (± 25,50 )	24,75 (± 2,06 )	63,50 (± 4,20 )	1,17 (± 0,06 )	7,42 (± 0,03 )	22,00 (± 3,74 )	133,50 (± 6,14 )	68,00 (± 21,02 )	43,75 (± 2,06 )			1,50 (± 0,77 )	9,98 (± 0,86 )	9,55 (± 0,44 )	27,18 (± 2,72 )	28,35 (± 1,31 )	9,80 (± 0,14 )	35,28 (± 2,03 )	23,93 (± 0,77 )	27,73 (± 0,41 )	0,12 (± 0,13 )	17,80 (± NA )	10,73 (± 2,25 )	10,83 (± 2,53 )	4,29 (± 0,85 )	5,37 (± 1,50 )	0,51 (± 0,08 )			0,44 (± 0,15 )	0,11 (± 0,06 )	481,00 (± 42,36 )	420,50 (± 33,31 )
Mean(after)						143,00 (± 2,83 )	102,50 (± 0,71 )	4,45 (± 0,07 )	106,50 (± 26,16 )	21,00 (± 0,00 )	53,00 (± 2,83 )	1,19 (± 0,06 )	7,51 (± 0,00 )	20,00 (± 2,83 )	122,00 (± 5,66 )	64,50 (± 26,16 )	39,50 (± 0,71 )			0,65 (± 0,92 )	8,88 (± 0,49 )	8,75 (± 0,35 )	23,70 (± 0,71 )	26,70 (± 0,71 )	9,90 (± 0,14 )	36,90 (± 0,42 )	23,00 (± 0,85 )	26,70 (± 0,71 )	0,19 (± 0,13 )	22,10 (± 3,96 )	10,43 (± 2,10 )	10,81 (± 1,28 )	5,44 (± 2,40 )	4,34 (± 0,01 )	0,35 (± 0,04 )			0,20 (± 0,20 )	0,11 (± 0,05 )	401,00 (± 2,83 )	348,50 (± 3,54 )
Mean(a day after)						140,75 (± 1,89 )	104,00 (± 1,41 )	4,75 (± 0,60 )	87,25 (± 5,74 )	24,50 (± 2,08 )	60,25 (± 4,79 )	1,17 (± 0,04 )	7,40 (± 0,04 )	20,75 (± 2,06 )	135,00 (± 13,74 )	59,25 (± 24,36 )	48,75 (± 2,06 )			1,15 (± 0,84 )	9,58 (± 1,50 )	9,35 (± 1,63 )	25,40 (± 3,54 )	26,58 (± 0,57 )	9,73 (± 0,21 )	36,60 (± 1,42 )	23,70 (± 0,57 )	27,30 (± 1,98 )	0,19 (± 0,10 )	21,05 (± 8,01 )	11,00 (± 2,37 )	9,63 (± 2,03 )	3,80 (± 0,61 )	6,25 (± 1,89 )	0,43 (± 0,05 )			0,40 (± 0,21 )	0,14 (± 0,06 )	552,50 (± 141,34 )	435,25 (± 111,53 )
% deviation from the T0 mean (after)						0.350877	-3.98126	0	13.2979	-15.1515	-16.5354	2.14592	1.24705	-9.09091	-8.61423	-5.14706	-9.71429			-56.6667	-11.0443	-8.37696	-12.7875	-5.82011	1.02041	4.60666	-3.86625	-3.69702	51.0204	24.1573	-2.81986	-0.23084	26.69	-19.2182	-32.3529			-54.8023	-6.66667	-16.632	-17.1225
% deviation from the T0 mean (a day after)						-1.22807	-2.57611	6.74157	-7.18085	-1.0101	-5.11811	0.214592	-0.269633	-5.68182	1.1236	-12.8676	11.4286			-23.3333	-4.03206	-2.09424	-6.53174	-6.26102	-0.765306	3.7562	-0.940439	-1.53291	57.1429	18.2584	2.56351	-11.1265	-11.3636	16.3797	-16.6667			-10.7345	27.4074	14.8649	3.50773
Kruskal-Wallis tests (by type)						> kruskal.test( Na ~Type, data=data_1)	> kruskal.test( Cl ~Type, data=data_1)	> kruskal.test( K ~Type, data=data_1)	> kruskal.test( Cre ~Type, data=data_1)	> kruskal.test( Alb ~Type, data=data_1)	> kruskal.test( Prot ~Type, data=data_1)	> kruskal.test( Ca ~Type, data=data_1)	> kruskal.test( pH ~Type, data=data_1)	> kruskal.test( ALT ~Type, data=data_1)	> kruskal.test( AST ~Type, data=data_1)	> kruskal.test( PAL ~Type, data=data_1)	> kruskal.test( GGT ~Type, data=data_1)			> kruskal.test( SAA ~Type, data=data_1)	> kruskal.test( RBC ~Type, data=data_1)	> kruskal.test( HGB ~Type, data=data_1)	> kruskal.test( HCT ~Type, data=data_1)	> kruskal.test( MCV ~Type, data=data_1)	> kruskal.test( MCH ~Type, data=data_1)	> kruskal.test( MCHC ~Type, data=data_1)	> kruskal.test( RDW_ST ~Type, data=data_1)	> kruskal.test( RDW_CV ~Type, data=data_1)	> kruskal.test( RET ~Type, data=data_1)	> kruskal.test( RET_He ~Type, data=data_1)	> kruskal.test( WBC ~Type, data=data_1)	> kruskal.test( D_WBC ~Type, data=data_1)	> kruskal.test( Neut ~Type, data=data_1)	> kruskal.test( Lymph ~Type, data=data_1)	> kruskal.test( Mono ~Type, data=data_1)			> kruskal.test( EO ~Type, data=data_1)	> kruskal.test( Baso ~Type, data=data_1)	> kruskal.test( PLT_I ~Type, data=data_1)	> kruskal.test( PLT_O ~Type, data=data_1)
Kruskal-Wallis results (by type)						Kruskal-Wallis chi-squared = 1.2525, df = 2, p-value = 0.5346	Kruskal-Wallis chi-squared = 1.8409, df = 2, p-value = 0.3983	Kruskal-Wallis chi-squared = 0.74306, df = 2, p-value = 0.6897	Kruskal-Wallis chi-squared = 0.46242, df = 2, p-value = 0.7936	Kruskal-Wallis chi-squared = 4.4583, df = 2, p-value = 0.1076	Kruskal-Wallis chi-squared = 4.6587, df = 2, p-value = 0.09736	Kruskal-Wallis chi-squared = 0.67638, df = 2, p-value = 0.7131	Kruskal-Wallis chi-squared = 5.0377, df = 2, p-value = 0.08055	Kruskal-Wallis chi-squared = 0.44575, df = 2, p-value = 0.8002	Kruskal-Wallis chi-squared = 2.9195, df = 2, p-value = 0.2323	Kruskal-Wallis chi-squared = 0.56936, df = 2, p-value = 0.7523	Kruskal-Wallis chi-squared = 7.5694, df = 2, p-value = 0.02272			Kruskal-Wallis chi-squared = 0.93175, df = 2, p-value = 0.6276	Kruskal-Wallis chi-squared = 0.95455, df = 2, p-value = 0.6205	Kruskal-Wallis chi-squared = 1.0146, df = 2, p-value = 0.6021	Kruskal-Wallis chi-squared = 2.4545, df = 2, p-value = 0.2931	Kruskal-Wallis chi-squared = 2.936, df = 2, p-value = 0.2304	Kruskal-Wallis chi-squared = 1.0809, df = 2, p-value = 0.5825	Kruskal-Wallis chi-squared = 1.7287, df = 2, p-value = 0.4213	Kruskal-Wallis chi-squared = 2.2244, df = 2, p-value = 0.3288	Kruskal-Wallis chi-squared = 1.5497, df = 2, p-value = 0.4608	Kruskal-Wallis chi-squared = 0.95245, df = 2, p-value = 0.6211	Kruskal-Wallis chi-squared = 1.5, df = 2, p-value = 0.4724	Kruskal-Wallis chi-squared = 0.081818, df = 2, p-value = 0.9599	Kruskal-Wallis chi-squared = 0.66667, df = 2, p-value = 0.7165	Kruskal-Wallis chi-squared = 1.5818, df = 2, p-value = 0.4534	Kruskal-Wallis chi-squared = 1.3091, df = 2, p-value = 0.5197	Kruskal-Wallis chi-squared = 6.3273, df = 2, p-value = 0.04227			Kruskal-Wallis chi-squared = 1.0146, df = 2, p-value = 0.6021	Kruskal-Wallis chi-squared = 0.63025, df = 2, p-value = 0.7297	Kruskal-Wallis chi-squared = 2.5244, df = 2, p-value = 0.283	Kruskal-Wallis chi-squared = 2.4545, df = 2, p-value = 0.2931
Dunn tests (by type)																	>kwAllPairsDunnTest(GGT~Type, data=data_1)																		>kwAllPairsDunnTest(Mono~Type, data=data_1)
Dunn results (by type)																		A day after	After																	A day after	After
																	After	0.024	-																After	0.32	-
																	Before	0.154	0.229																Before	0.32	0.04

## Sheet: S3
Sheep ID	Sheep ID	Before/After HD	Days	Membrane	Type	Sodium (Na) (mmol/L)	Chlore (Cl) (mmol/L)	Potassium (K) (mmol/L)	Creatine (µmol/L)	Albumin (g/L)	Protein (g/L)	Calcium (Ca) (mmol/L)	pH	Alanine aminotransferase (ALT) (UI/L)	Aspartate aminotransferase (AST) (UI/L)	Alkaline phosphatase (ALP) (UI/L)	Gamma glutamyl transferase (GGT) (UI/L)			Serum amyloid A (SAA) (mg/mL)	Red blood cells (RBC) (10^12/L)	Hemoglobin (HGB) (g/dL)	Hematocrit (HCT) (%)	Mean corpuscular volume (MCV) (fL)	Mean corpuscular hemoglobin (MCH) (pg)	Mean corpuscular hemoglobin concentration (MCHC) (g/dL)	Red blood cells distribution width (RDW-SD) (fL)	Red blood cells distribution width (RDW-CV) (%)	Reticulocyte hemoglobin equivalent (RET) (%)			Reticulocyte hemoglobin equivalent (RET_He) (pg)	White blood cells (WBC) (10^9/L)	White blood cells (D-WBC) (10^9/L)	Neutrophils (10^9/L)	Lymphocytes (10^9/L)	Monocytes (10^9/L)	Eosinophils (10^9/L)	Basophils (10^9/L)	Platelet impedance (PLT-I) (10^9/L)	Platelet optical fluorescence (PLT-O) (10^9/L)
Sheep C	50543	No HD	D0	No HD	Before HD	143	101	4.2	73	24	65	1.07	7.34	22	112	85	35			1.8	9.47	8.8	22	23.2	9.3	40	19.5	28.1	0.09			24.2	8.94	8.86	3.14	4.97	0.31	0.47	0.05	244	296
Sheep D	50534	No HD	D0	No HD	Before HD	143	103	4.9	142	27	73	1.14	7.32	35	190	100	42			1.5	11.21	10.8	29.4	26.2	9.6	36.7	23.9	29.5	0.14			22.6	9.6	9.49	2.56	5.58	0.09	1.18	0.22
Sheep C	50543	Before HD	D4	Septex	Before HD	141	107	4.5	83	22	64	1.18	7.45	21	107	59	36			0.5	9.81	9.2	22.8	23.2	9.4	40.4	19.9	28.7	0.09			18.6	7.99	8.2	2.19	5.12	0.32	0.27	0.09	303	227
Sheep D	50534	Before HD	D4	Septex	Before HD	144	108	4.8	113	22	61	1.22	7.38	34	181	107	41			0.4	9.01	8.7	24.4	27.1	9.7	35.7	23.6	26.7	0.1			17.2	8.67	8.66	2.24	4.99	0.13	1.09	0.22	345	258
Sheep C	50543	After HD	D4	Septex	After HD	140.6	103.1	3.83	82.5	18.3	56.9	1.125	7.426	17.3	85.1	31.2	33.4			1.11	8.97	8.4	21	23.4	9.4	40	19.6	27.7	0.06			15.8	7.09	6.78	2.67	4.1	0.24	0.04	0.04	221	208
Sheep D	50534	After HD	D4	Septex	After HD	144.5	105.3	4.32	117.9	21.3	55.5	1.292	7.407	31.6	162.2	95.6	35.4			-0.06	8.83	8.6	24	27.1	9.7	35.8	23.7	26.3	0.12			25.4	10.4	10.35	3.4	5.99	0.18	0.67	0.16	249	245
Sheep C	50543	No HD	D7	No HD	N day(s) after HD	142	104	4.2	83	21	61	1.12	7.45	21	114	83	47			1.2	9.39	8.8	21.8	23.2	9.4	40.4	20.1	28.8	0.18			16.8	10.29	10.18	2.76	6.49	0.49	0.45	0.1	445	323
Sheep D	50534	No HD	D7	No HD	N day(s) after HD	140	104	4.7	99	24	58	1.14	7.49	26	160	33	47			8	7.73	7.4	20.9	27	9.6	35.4	22.9	25.2	0.17			18.6	9.79	9.76	3.37	5.38	0.25	0.66	0.13	318	292
Sheep C	50543	No HD	D10	No HD	N day(s) after HD	143	104	4.9	78	23	75	1.2	7.37	24	142	76	48			0	10.8	10.1	24.9	23.1	9.4	40.6			0.2			23.8	11.7		3.3	7.1	0.5	0.7	0.1	601	509
Sheep D	50534	No HD	D10	No HD	N day(s) after HD	144	104	5.3	86	25	74	1.28	7.42	26	152	35	48			6.9	9.9	9.6	25.8	26.1	9.7	37.2			0.4			34.6	11.4		2.8	7.7	0.3	0.5	0.1	820	726
Mean(before)						142,75 (± 1,26 )	104,75 (± 3,30 )	4,60 (± 0,32 )	102,75 (± 31,20 )	23,75 (± 2,36 )	65,75 (± 5,12 )	1,15 (± 0,06 )	7,37 (± 0,06 )	28,00 (± 7,53 )	147,50 (± 44,08 )	87,75 (± 21,25 )	38,50 (± 3,51 )			1,05 (± 0,70 )	9,88 (± 0,95 )	9,38 (± 0,97 )	24,65 (± 3,32 )	24,93 (± 2,03 )	9,50 (± 0,18 )	38,20 (± 2,35 )	21,73 (± 2,35 )	28,25 (± 1,18 )	0,11 (± 0,02 )			20,65 (± 3,29 )	8,80 (± 0,67 )	8,80 (± 0,54 )	2,53 (± 0,44 )	5,17 (± 0,28 )	0,21 (± 0,12 )	0,75 (± 0,45 )	0,15 (± 0,09 )	297,33 (± 50,74 )	260,33 (± 34,56 )
Mean(after)						142,55 (± 2,76 )	104,20 (± 1,56 )	4,08 (± 0,35 )	100,20 (± 25,03 )	19,80 (± 2,12 )	56,20 (± 0,99 )	1,21 (± 0,12 )	7,42 (± 0,01 )	24,45 (± 10,11 )	123,65 (± 54,52 )	63,40 (± 45,54 )	34,40 (± 1,41 )			0,53 (± 0,83 )	8,90 (± 0,10 )	8,50 (± 0,14 )	22,50 (± 2,12 )	25,25 (± 2,62 )	9,55 (± 0,21 )	37,90 (± 2,97 )	21,65 (± 2,90 )	27,00 (± 0,99 )	0,09 (± 0,04 )			20,60 (± 6,79 )	8,75 (± 2,34 )	8,57 (± 2,52 )	3,04 (± 0,52 )	5,05 (± 1,34 )	0,21 (± 0,04 )	0,36 (± 0,45 )	0,10 (± 0,08 )	235,00 (± 19,80 )	226,50 (± 26,16 )
Mean(a day after)						142,25 (± 1,71 )	104,00 (± 0,00 )	4,78 (± 0,46 )	86,50 (± 8,96 )	23,25 (± 1,71 )	67,00 (± 8,76 )	1,19 (± 0,07 )	7,43 (± 0,05 )	24,25 (± 2,36 )	142,00 (± 20,07 )	56,75 (± 26,44 )	47,50 (± 0,58 )			4,03 (± 4,01 )	9,46 (± 1,29 )	8,98 (± 1,18 )	23,35 (± 2,37 )	24,85 (± 2,00 )	9,53 (± 0,15 )	38,40 (± 2,54 )	21,50 (± 1,98 )	27,00 (± 2,55 )	0,24 (± 0,11 )			23,45 (± 8,00 )	10,80 (± 0,90 )	9,97 (± 0,30 )	3,06 (± 0,32 )	6,67 (± 0,99 )	0,39 (± 0,13 )	0,58 (± 0,12 )	0,11 (± 0,01 )	546,00 (± 216,25 )	462,50 (± 200,10 )
% deviation from the T0 mean (after)						-0.140105	-0.52506	-11.413	-2.48175	-16.6316	-14.5247	4.859	0.596812	-12.6786	-16.1695	-27.7493	-10.6494			-50	-9.87342	-9.33333	-8.72211	1.30391	0.526316	-0.78534	-0.345224	-4.42478	-14.2857			-0.242131	-0.625	-2.6981	19.8421	-2.32333	-1.17647	-52.8239	-31.0345	-20.9641	-12.9962
% deviation from the T0 mean (a day after)						-0.350263	-0.71599	3.80435	-15.8151	-2.10526	1.90114	2.81996	0.813835	-13.3929	-3.72881	-35.3276	23.3766			283.333	-4.25316	-4.26667	-5.27383	-0.300903	0.263158	0.52356	-1.03567	-4.42478	126.19			13.5593	22.6705	13.2633	20.7305	29.09	81.1765	-23.2558	-25.8621	83.6323	77.6569
Kruskal-Wallis tests (by type)						> kruskal.test( Na ~Type, data=data_1)	> kruskal.test( Cl ~Type, data=data_1)	> kruskal.test( K ~Type, data=data_1)	> kruskal.test( Cre ~Type, data=data_1)	> kruskal.test( Alb ~Type, data=data_1)	> kruskal.test( Prot ~Type, data=data_1)	> kruskal.test( Ca ~Type, data=data_1)	> kruskal.test( pH ~Type, data=data_1)	> kruskal.test( ALT ~Type, data=data_1)	> kruskal.test( AST ~Type, data=data_1)	> kruskal.test( PAL ~Type, data=data_1)	> kruskal.test( GGT ~Type, data=data_1)			> kruskal.test( SAA ~Type, data=data_1)	> kruskal.test( RBC ~Type, data=data_1)	> kruskal.test( HGB ~Type, data=data_1)	> kruskal.test( HCT ~Type, data=data_1)	> kruskal.test( MCV ~Type, data=data_1)	> kruskal.test( MCH ~Type, data=data_1)	> kruskal.test( MCHC ~Type, data=data_1)	> kruskal.test( RDW_ST ~Type, data=data_1)	> kruskal.test( RDW_CV ~Type, data=data_1)	> kruskal.test( RET ~Type, data=data_1)			> kruskal.test( RET_He ~Type, data=data_1)	> kruskal.test( WBC ~Type, data=data_1)	> kruskal.test( D_WBC ~Type, data=data_1)	> kruskal.test( Neut ~Type, data=data_1)	> kruskal.test( Lymph ~Type, data=data_1)	> kruskal.test( Mono ~Type, data=data_1)	> kruskal.test( EO ~Type, data=data_1)	> kruskal.test( Baso ~Type, data=data_1)	> kruskal.test( PLT_I ~Type, data=data_1)	> kruskal.test( PLT_O ~Type, data=data_1)
Kruskal-Wallis results (by type)						Kruskal-Wallis chi-squared = 0.29531, df = 2, p-value = 0.8627	Kruskal-Wallis chi-squared = 0, df = 2, p-value = 1	Kruskal-Wallis chi-squared = 2.7055, df = 2, p-value = 0.2585	Kruskal-Wallis chi-squared = 0.28811, df = 2, p-value = 0.8658	Kruskal-Wallis chi-squared = 3.4371, df = 2, p-value = 0.1793	Kruskal-Wallis chi-squared = 4.404, df = 2, p-value = 0.1106	Kruskal-Wallis chi-squared = 0.39787, df = 2, p-value = 0.8196	Kruskal-Wallis chi-squared = 2.0442, df = 2, p-value = 0.3598	Kruskal-Wallis chi-squared = 0.62117, df = 2, p-value = 0.733	Kruskal-Wallis chi-squared = 0.32727, df = 2, p-value = 0.8491	Kruskal-Wallis chi-squared = 2.9455, df = 2, p-value = 0.2293	Kruskal-Wallis chi-squared = 7.3712, df = 2, p-value = 0.02508			Kruskal-Wallis chi-squared = 2.0455, df = 2, p-value = 0.3596	Kruskal-Wallis chi-squared = 2.6727, df = 2, p-value = 0.2628	Kruskal-Wallis chi-squared = 2.593, df = 2, p-value = 0.2735	Kruskal-Wallis chi-squared = 0.95455, df = 2, p-value = 0.6205	Kruskal-Wallis chi-squared = 1.1461, df = 2, p-value = 0.5638	Kruskal-Wallis chi-squared = 0.2625, df = 2, p-value = 0.877	Kruskal-Wallis chi-squared = 0.32439, df = 2, p-value = 0.8503	Kruskal-Wallis chi-squared = 0, df = 2, p-value = 1	Kruskal-Wallis chi-squared = 1.5, df = 2, p-value = 0.4724	Kruskal-Wallis chi-squared = 6.6677, df = 2, p-value = 0.03566			Kruskal-Wallis chi-squared = 0.12348, df = 2, p-value = 0.9401	Kruskal-Wallis chi-squared = 4.6909, df = 2, p-value = 0.0958	Kruskal-Wallis chi-squared = 2, df = 2, p-value = 0.3679	Kruskal-Wallis chi-squared = 3.6818, df = 2, p-value = 0.1587	Kruskal-Wallis chi-squared = 4.5545, df = 2, p-value = 0.1026	Kruskal-Wallis chi-squared = 3.0545, df = 2, p-value = 0.2171	Kruskal-Wallis chi-squared = 0.73636, df = 2, p-value = 0.692	Kruskal-Wallis chi-squared = 0.3375, df = 2, p-value = 0.8447	Kruskal-Wallis chi-squared = 5.5, df = 2, p-value = 0.06393	Kruskal-Wallis chi-squared = 5.5, df = 2, p-value = 0.06393
Dunn tests (by type)																	>kwAllPairsDunnTest(GGT~Type, data=data_1)												>kwAllPairsDunnTest(RET~Type, data=data_1)
Dunn results (by type)																		A day after	After											A day after	After
																	After	0.038	-										After	0.078	-
																	Before	0.092	0.388										Before	0.078	0.774

## Sheet: S4
Sample Id	Membrane	Sheep	Day	Time (hours)	Copper (Cu 63, ppb)			Copper (Cu 65, ppb)		Zinc (Zn 66, ppb)			Zinc (Zn 68, ppb)		Iron (Fe 56, ppb)
HD_A_D_t0	Theralite	A	D1	T0	0.045			0.015		81.629			91.048		41.739
HD_C_D_t0	Theralite	C	D2	T0	0.002			0.022		81.159			88.679		38.528
HD_D_D_t0	Theralite	D	D2	T0	0.016			0.033		68.817			76.795		57.775
HD_A_D_1 h_out	Theralite	A	D1	T1	101.72			102.214		181.544			183.513		134.048
HD_C_D_1 h_out	Theralite	C	D2	T1	72.768			73.388		129.345			133.155		133.629
HD_D_D_1 h_out	Theralite	D	D2	T1	54.952			55.019		171.888			171.949		252.053
HD_A_D_2 h_out	Theralite	A	D1	T2	148.252			148.549		221.795			222.65		174.009
HD_C_D_2 h_out	Theralite	C	D2	T2	108.744			108.085		171.876			173.117		174.911
HD_D_D_2 h_out	Theralite	D	D2	T2	64.43			64.431		187.292			190.536		237.352
HD_A_D_3 h_out	Theralite	A	D1	T3	163.29			162.9		227.006			229.353		180.19
HD_C_D_3 h_out	Theralite	C	D2	T3	133.449			133.912		206.356			207.924		214.428
HD_D_D_3 h_out	Theralite	D	D2	T3	72.274			72.271		206.869			207.08		232.185
HD_A_D_tf	Theralite	A	D1	T4	183.117			182.611		316.36			320.166		199.261
HD_C_D_tf	Theralite	C	D2	T4	143.46			142.335		250.024			256.549		219.298
HD_D_D_tf	Theralite	D	D2	T4	69.526			69.449		216.974			219.995		216.324
HD_A_D_2J_t0	HF6	A	D3	T0	3.604			4.064		72.859			78.23		47.136
HD_B_D_2J_t0	HF6	B	D3	T0	1.573			2.043		56.929			61.477		49.181
HD_A_D_2J_1 h_out	HF6	A	D3	T1	4.424			4.959		35.904			37.995		51.828
HD_B_D_2J_1 h_out	HF6	B	D3	T1	8.358			8.63		50.179			49.993		87.168
HD_A_D_2J_2 h_out	HF6	A	D3	T2	5.075			5.323		36.773			39.138		45.565
HD_B_D_2J_2 h_out	HF6	B	D3	T2	8.687			8.868		42.816			44.095		80.282
HD_A_D_2J_3 h_out	HF6	A	D3	T3	5.136			5.245		35.668			35.56		44.259
HD_B_D_2J_3 h_out	HF6	B	D3	T3	9.472			9.909		44.195			46.509		96.66
HD_A_D_2J_tf	HF6	A	D3	T4	4.631			5.192		58.561			61.181		53.732
HD_B_D_2J_tf	HF6	B	D3	T4	9.066			9.173		70.308			69.918		87.737
HD_C_D_2J_t0	Septex	C	D4	T0	0.653			0.955		31.789			37.313		46.196
HD_D_D_2J_t0	Septex	D	D4	T0	1.237			1.676		40.972			43.617		41.059
HD_C_D_2J_1 h_out	Septex	C	D4	T1	101.696			100.582		191.772			193.503		266.907
HD_D_D_2J_1 h_out	Septex	D	D4	T1	123.71			123.394		268.241			271.775		452.149
HD_C_D_2J_2 h_out	Septex	C	D4	T2	145.665			146.238		254.233			256.08		339.631
HD_D_D_2J_2 h_out	Septex	D	D4	T2	146.844			147.899		320.267			325.194		504.153
HD_C_D_2J_3 h_out	Septex	C	D4	T3	159.123			156.571		274.837			278.801		359.941
HD_D_D_2J_3 h_out	Septex	D	D4	T3	151.375			150.405		323			331.435		504.418
HD_C_D_2J_tf	Septex	C	D4	T4	186.488			186.153		347.672			362.115		412.675
HD_D_D_2J_tf	Septex	D	D4	T4	157.036			154.579		369.878			378.947		501.229
Theralite membrane				Mean(T0)	0,022 (± 0,015 )					81,355 (± 8,071 )					46,014 (± 10,311 )
				Mean(T1)	76,677 (± 21,196 )					161,899 (± 24,248 )					173,243 (± 68,251 )
				Mean(T2)	107,082 (± 37,567 )					194,544 (± 22,690 )					195,424 (± 36,314 )
				Mean(T3)	123,016 (± 41,449 )					214,098 (± 10,944 )					208,934 (± 26,429 )
				Mean(T4)	131,750 (± 51,435 )					263,345 (± 45,370 )					211,628 (± 10,813 )
HF6 membrane				Mean(T0)	2,821 (± 1,200 )					67,374 (± 9,863 )					48,159 (± 1,446 )
				Mean(T1)	6,593 (± 2,209 )					43,518 (± 7,633 )					69,498 (± 24,989 )
				Mean(T2)	6,988 (± 2,070 )					40,706 (± 3,360 )					62,924 (± 24,549 )
				Mean(T3)	7,441 (± 2,605 )					40,483 (± 5,701 )					70,460 (± 37,053 )
				Mean(T4)	7,016 (± 2,441 )					64,992 (± 6,011 )					70,735 (± 24,045 )
SepteX membrane				Mean(T0)	1,130 (± 0,435 )					38,423 (± 5,122 )					43,628 (± 3,632 )
				Mean(T1)	112,346 (± 12,949 )					231,323 (± 44,699 )					359,528 (± 130,986 )
				Mean(T2)	146,662 (± 0,955 )					288,944 (± 39,073 )					421,892 (± 116,335 )
				Mean(T3)	154,369 (± 4,168 )					302,018 (± 29,345 )					432,180 (± 102,161 )
				Mean(T4)	171,064 (± 17,646 )					364,653 (± 13,247 )					456,952 (± 62,617 )
Kruskal-Wallis tests (membrane Theralite, with time (hours))					> kruskal.test( Cu ~ Time_1, data=data_1)					> kruskal.test( Zn ~ Time_1, data=data_1)					Not applicable due to the insufficient number of measures to assess significance
Kruskal-Wallis results (membrane Theralite, with time (hours))					Kruskal-Wallis chi-squared = 16.998, df = 4, p-value = 0.001935					Kruskal-Wallis chi-squared = 24.172, df = 4, p-value = 7.378e-05
Dunn tests (membrane Theralite, with time (hours))					> kwALLPairDunnTest( Cu ~ Time_1, data=data_1)					> kwALLPairDunnTest( Zn ~ Time_1, data=data_1)
Dunn results (membrane Theralite, with time (hours))						T0	T1	T2	T3		T0	T1	T2	T3
					T1	0.344	-	-	-	T1	0.674	-	-	-
					T2	0.031	1.000	-	-	T2	0.074	0.713	-	-
					T3	0.006	0.745	1.000	-	T3	0.006	0.252	0.713	-
					T4	0.004	0.693	1.000	1.000	T4	8.2e-05	0.016	0.286	0.713
Kruskal-Wallis tests (membrane HF6, with time (hours))					> kruskal.test( Cu ~ Time_1, data=data_1)					> kruskal.test( Zn ~ Time_1, data=data_1)
Kruskal-Wallis results (membrane HF6, with time (hours))					Kruskal-Wallis chi-squared = 10.6, df = 4, p-value = 0.03145					Kruskal-Wallis chi-squared = 14.071, df = 4, p-value = 0.007071
Dunn tests (membrane HF6, with time (hours))					> kwALLPairDunnTest( Cu ~ Time_1, data=data_1)					> kwALLPairDunnTest( Zn ~ Time_1, data=data_1)
Dunn results (membrane HF6, with time (hours))						T0	T1	T2	T3		T0	T1	T2	T3
					T1	0.582	-	-	-	T1	0.162	-	-	-
					T2	0.128	1.000	-	-	T2	0.092	1.000	-	-
					T3	0.034	1.000	1.000	-	T3	0.060	1.000	1.000	-
					T4	0.128	1.000	1.000	1.000	T4	1.000	0.243	0.138	0.097
Kruskal-Wallis tests (membrane SepteX, with time (hours))					> kruskal.test( Cu ~ Time_1, data=data_1)					> kruskal.test( Zn ~ Time_1, data=data_1)
Kruskal-Wallis results (membrane SepteX, with time (hours))					Kruskal-Wallis chi-squared = 17.729, df = 4, p-value = 0.001394					Kruskal-Wallis chi-squared = 16.529, df = 4, p-value = 0.002386
Dunn tests (membrane SepteX, with time (hours))					> kwALLPairDunnTest( Cu ~ Time_1, data=data_1)					> kwALLPairDunnTest( Zn ~ Time_1, data=data_1)
Dunn results (membrane SepteX, with time (hours))						T0	T1	T2	T3		T0	T1	T2	T3
					T1	1.000	-	-	-	T1	0.846	-	-	-
					T2	0.335	1.000	-	-	T2	0.340	0.874	-	-
					T3	0.021	0.255	1.000	-	T3	0.081	0.846	0.874	-
					T4	0.003	0.057	0.415	1.000	T4	0.001	0.077	0.384	0.846

## Sheet: S5
Membrane	Sheep	Time (hours)	Copper (Cu 63, ppb)	Copper (Cu 65, ppb)		Zinc (Zn 66, ppb)	Zinc (Zn 68, ppb)		Iron (Fe 56, ppb)
Theralite	A	T4-T0	183.072	182.596		234.731	229.118		157.522
Theralite	C	T4-T0	143.458	142.313		168.865	167.87		180.77
Theralite	D	T4-T0	69.51	69.416		148.157	143.2		158.549
HF6	A	T4-T0	1.027	1.128		-14.298	-17.049		6.596
HF6	B	T4-T0	7.493	7.13		13.379	8.441		38.556
Septex	C	T4-T0	185.835	185.198		315.883	324.802		366.479
Septex	D	T4-T0	155.799	152.903		328.906	335.33		460.17
Theralite membrane		Mean(T4-T0)	131,728 (± 51,434 )			181,990 (± 40,059 )			165,614 (± 13,136 )
HF6 membrane		Mean(T4-T0)	4,195 (± 3,602 )			-2,382 (± 15,521 )			22,576 (± 22,599 )
SepteX membrane		Mean(T4-T0)	169,934 (± 18,034 )			326,230 (± 8,146 )			413,325 (± 66,250 )
Kruskal-Wallis tests (per membrane)			> kruskal.test( Cu ~ Membrane, data=data_1)			> kruskal.test( Zn ~ Membrane, data=data_1)			Not applicable due to the insufficient number of measures to assess significance
Kruskal-Wallis results (per membrane)			Kruskal-Wallis chi-squared = 9.5238, df = 2, p-value = 0.008549			Kruskal-Wallis chi-squared = 11.429, df = 2, p-value = 0.003299
Dunn tests (per membrane)			>kwAllPairsDunnTest(Cu~ Membrane, data=data_1)			>kwAllPairsDunnTest(Zn~ Membrane, data=data_1)
Dunn results (per membrane)				HF6	Septex		HF6	Septex
			Septex	0.007	-	Septex	0.0022	-
			Theralite	0.072	0.217	Theralite	0.1282	0.1282

## Sheet: S6
Sample Id	Membrane	Sheep	Day	Time	Copper (Cu 63, ppb)	Copper (Cu 65, ppb)	Zinc (Zn 66, ppb)	Zinc (Zn 68, ppb)
HD_A_WB_t0	Theralite	A	D1	T0	920.241	917.338	2239.74	2266.03
HD_C_WB_t0	Theralite	C	D2	T0	971.221	973.481	2042.16	2043.39
HD_D_WB_t0	Theralite	D	D2	T0	782.339	777.318	2850.85	2828.17
HD_A_WB_Tf	Theralite	A	D1	Tf	858.764	857.237	2175.85	2187.97
HD_C_WB_Tf	Theralite	C	D2	Tf	933.77	934.495	1900.19	1885.68
HD_D_WB_Tf	Theralite	D	D2	Tf	791.636	788.192	2696.62	2670.71
HD_A_J2_P_t0	HF6	A	D3	T0	994.461	992.081	2278.98	2275.6
HD_B_J2_WB_t0	HF6	B	D3	T0	1042.65	1045.81	2310.6	2304.55
HD_A_J2_P_Tf	HF6	A	D3	Tf	978.192	974.297	2261.78	2250.45
HD_B_J2_WB_Tf	HF6	B	D3	Tf	998.981	982.779	1936.21	1925.77
HD_C_J2_WB_t0	Septex	C	D4	T0	1005.01	999.716	1944.33	1939.35
HD_D_J2_WB_t0	Septex	D	D4	T0	852.24	854.036	2410.13	2414.03
HD_C_J2_WB_Tf	Septex	C	D4	Tf	963.794	946.554	1733.42	1717.36
HD_D_J2_WB_Tf	Septex	D	D4	Tf	830.842	826.046	2389.1	2400.63
Theralite membrane				T0(mean)	890,323 (± 88,899 )		2378,392 (± 369,499 )
				Tf(mean)	860,682 (± 64,541 )		2252,837 (± 358,011 )
HF6 membrane				T0(mean)	1018,750 (± 29,465 )		2292,433 (± 17,713 )
				Tf(mean)	983,562 (± 10,848 )		2093,552 (± 187,818 )
SepteX membrane				T0(mean)	927,751 (± 86,185 )		2176,960 (± 271,508 )
				Tf(mean)	891,809 (± 73,531 )		2060,128 (± 386,606 )

## Sheet: S7
Sample Id	Membrane	Sheep	Day	Time	Copper (Cu 63, ppb)	Copper (Cu 65, ppb)	Zinc (Zn 66, ppb)	Zinc (Zn 68, ppb)	Iron (Fe 56, ppb)
HD_A_P_t0	Theralite	A	D1	T0	1104.37	1099.99	377.72	378.783	512.603
HD_C_P_t0	Theralite	C	D2	T0	990.469	981.386	387.767	387.448	452.444
HD_D_P_t0	Theralite	D	D2	T0	950.869	941.04	917.764	914.177	1183.82
HD_A_P_Tf	Theralite	A	D1	Tf	1063.93	1072.7	551.014	551.548	464.179
HD_C_P_Tf	Theralite	C	D2	Tf	989.204	978.048	437.707	435.846	499.887
HD_D_P_Tf	Theralite	D	D2	Tf	897.946	894.535	841.391	831.752	1182.03
HD_A_J2_P_t0	HF6	A	D3	T0	1119.07	1116.32	692.429	689.735	1444.31
HD_B_J2_P_t0	HF6	B	D3	T0	1220.05	1224.37	620.596	618.689	1049.72
HD_A_J2_P_Tf	HF6	A	D3	Tf	1082.93	1074.31	683.643	698.982	1482.23
HD_B_J2_P_Tf	HF6	B	D3	Tf	1224.77	1220.74	482.745	486.108	1069.56
HD_C_J2_P_t0	Septex	C	D4	T0	1053.62	1056.56	610.629	618.489	941.515
HD_D_J2_P_t0	Septex	D	D4	T0	960.193	959.312	795.684	791.849	1252.8
HD_C_J2_P_Tf	Septex	C	D4	Tf	977.677	974.016	480.402	482.669	924.675
HD_D_J2_P_Tf	Septex	D	D4	Tf	901.903	905.794	649.185	644.933	1023.83
Theralite membrane				T0(mean)	1011,353 (± 72,724 )		560,610 (± 275,296 )		716,289 (± 406,009 )
				Tf(mean)	982,728 (± 77,096 )		608,210 (± 184,178 )		715,365 (± 404,536 )
HF6 membrane				T0(mean)	1169,951 (± 60,376 )		655,362 (± 41,268 )		1247,016 (± 279,014 )
				Tf(mean)	1150,686 (± 83,306 )		587,870 (± 119,618 )		1275,895 (± 291,800 )
SepteX membrane				T0(mean)	1007,422 (± 55,058 )		704,163 (± 103,527 )		1097,160 (± 220,115 )
				Tf(mean)	939,848 (± 41,625 )		564,297 (± 95,585 )		974,250 (± 70,110 )
